# Supplementary material for: OPT3 Is a Component of the Iron-Signaling Network between Leaves and Roots and Misregulation of OPT3 Leads to an Over-Accumulation of Cadmium in Seeds
Source: PubMed Central journal article supplement (PMC4153440; doi:10.1093/mp/ssu067), 2014-05-31
Supplement: supp_ssu067_Supp_Figs_wlegends__MPlantR1_.pdf [file supp_ssu067_Supp_Figs_wlegends__MPlantR1_.pdf]

# Cell Type Specific Arabidopsis eFP Browser

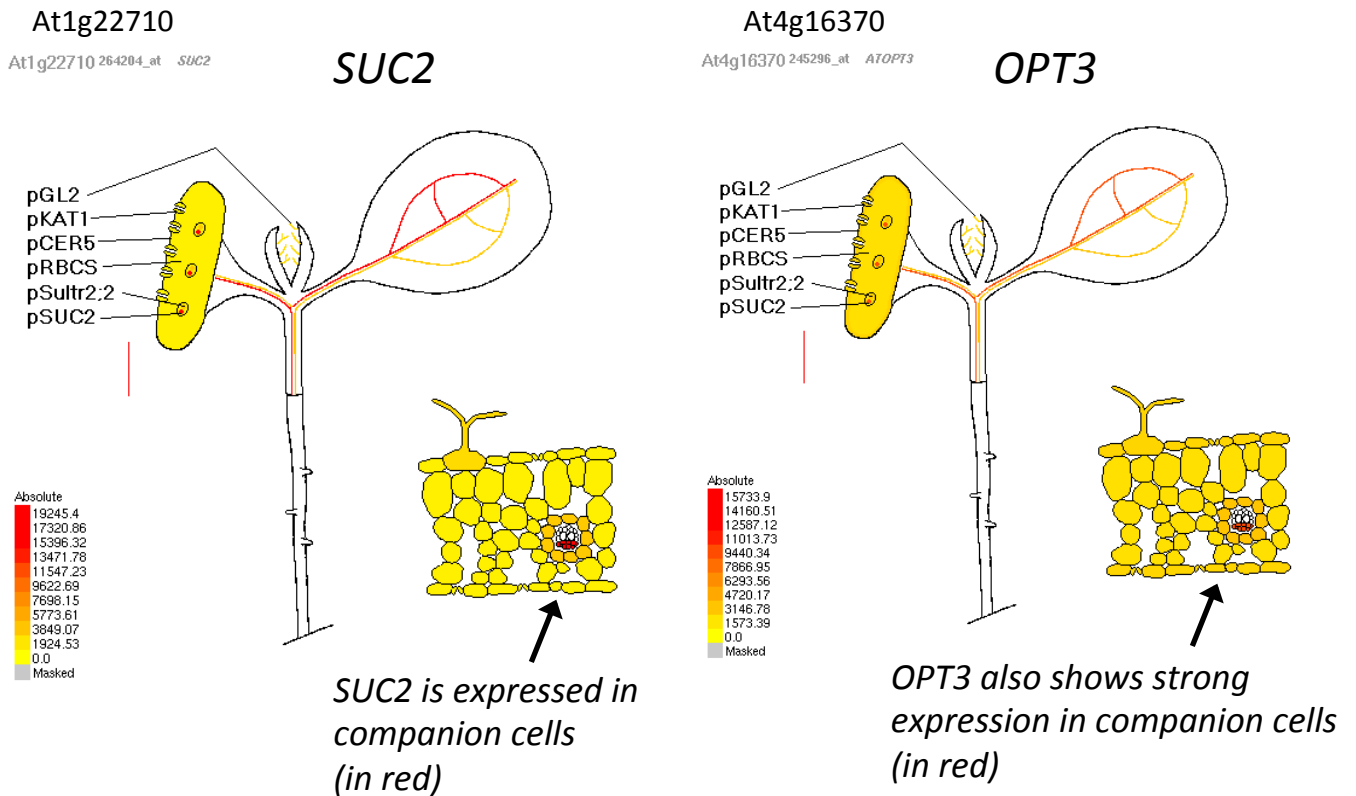

<http://efp.ucr.edu/cgi-bin/absolute.cgi>

**Supplemental Figure 1:** Cell type-specific translome analyses show *OPT3* expression in the phloem (companion cells). Signal intensities of *OPT3* overlap with those of the phloem sucrose transporter *SUC2*.

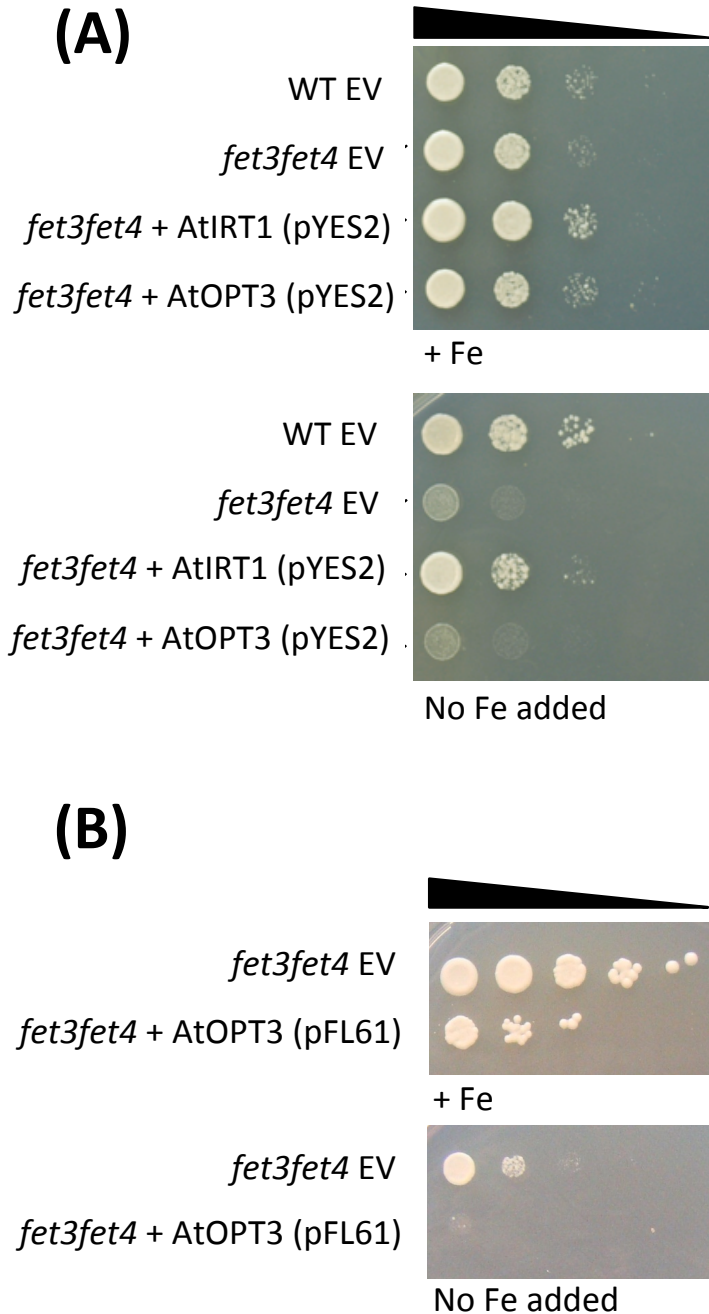

**Supplemental Figure 2:** *OPT3* does not rescue the growth of the *fet3fet4* yeast mutant on minimal media without supplemented Fe. **(A)** The yeast mutant *fet3fet4* can only grow on minimal media supplemented with Fe. Arabidopsis IRT1, but not OPT3, rescues the growth of *fet3fet4* on minimal media. Expression of IRT1 and OPT3 was driven by the GAL inducible promoter. **(B)** Expression of OPT3 driven by the constitutive promoter PGK also failed to rescue the growth of the *fet3fet4*. Note that *fet3fet4* yeast need to be iron starved prior to complementation tests to avoid growth of non-complementing strains.

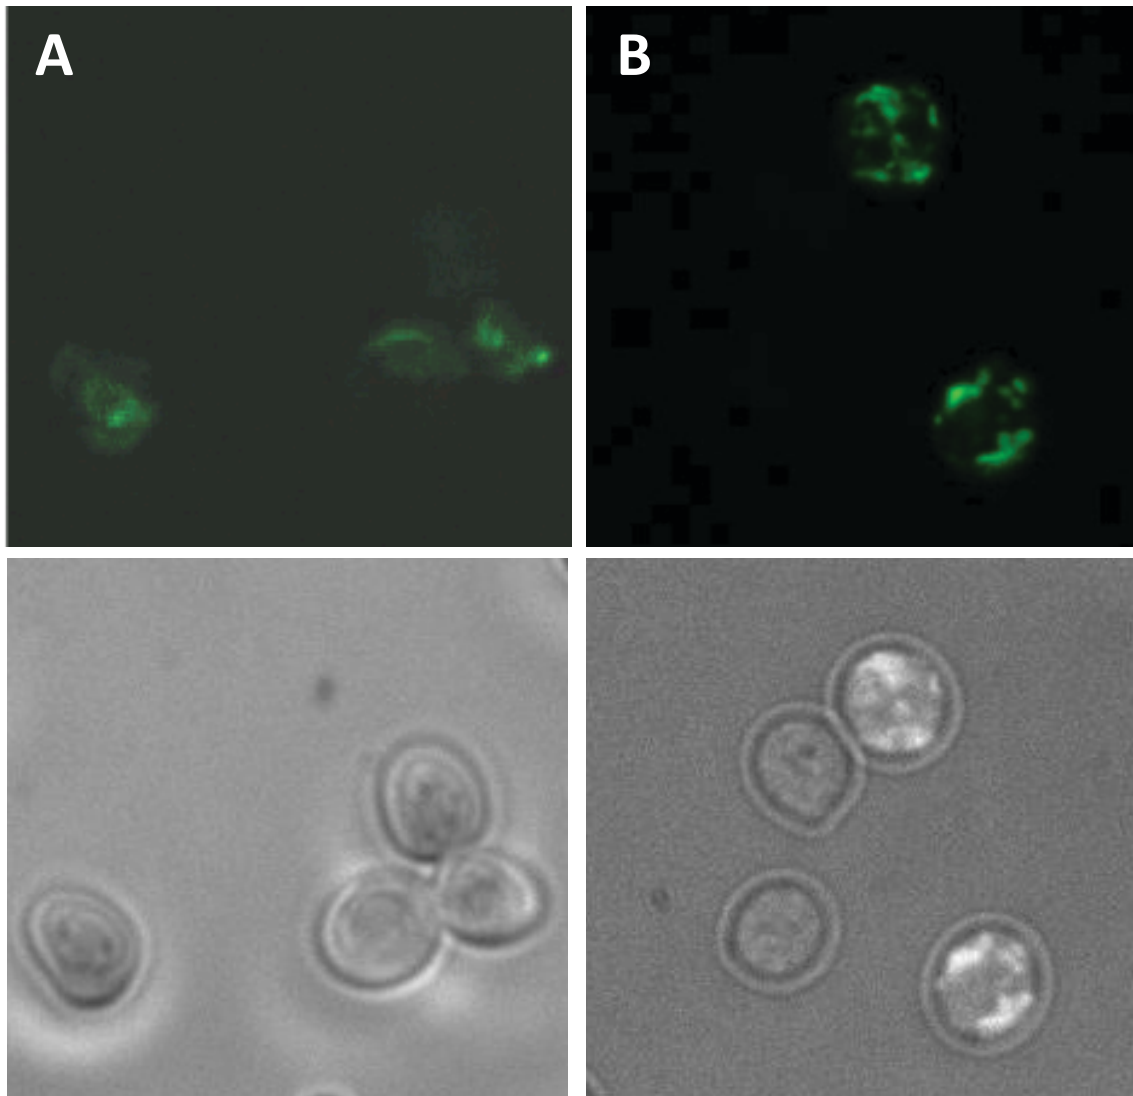

**Supplemental Figure 3:** OPT3 fails to transit out of the endoplasmic reticulum in *S. cerevisiae*. Brightfield and confocal microscopy of yeast expressing either (A) an N-terminal *YFP-OPT3* fusion or (B) a C-terminal *OPT3-YFP* fusion. Note the punctuate fluorescence throughout the cell. Notably, fluorescence is absent at the cell perimeter but present surrounding the nucleus, a typical hallmark of ER fluorescence in yeast. Bright-field images are shown below their respective fluorescence images.

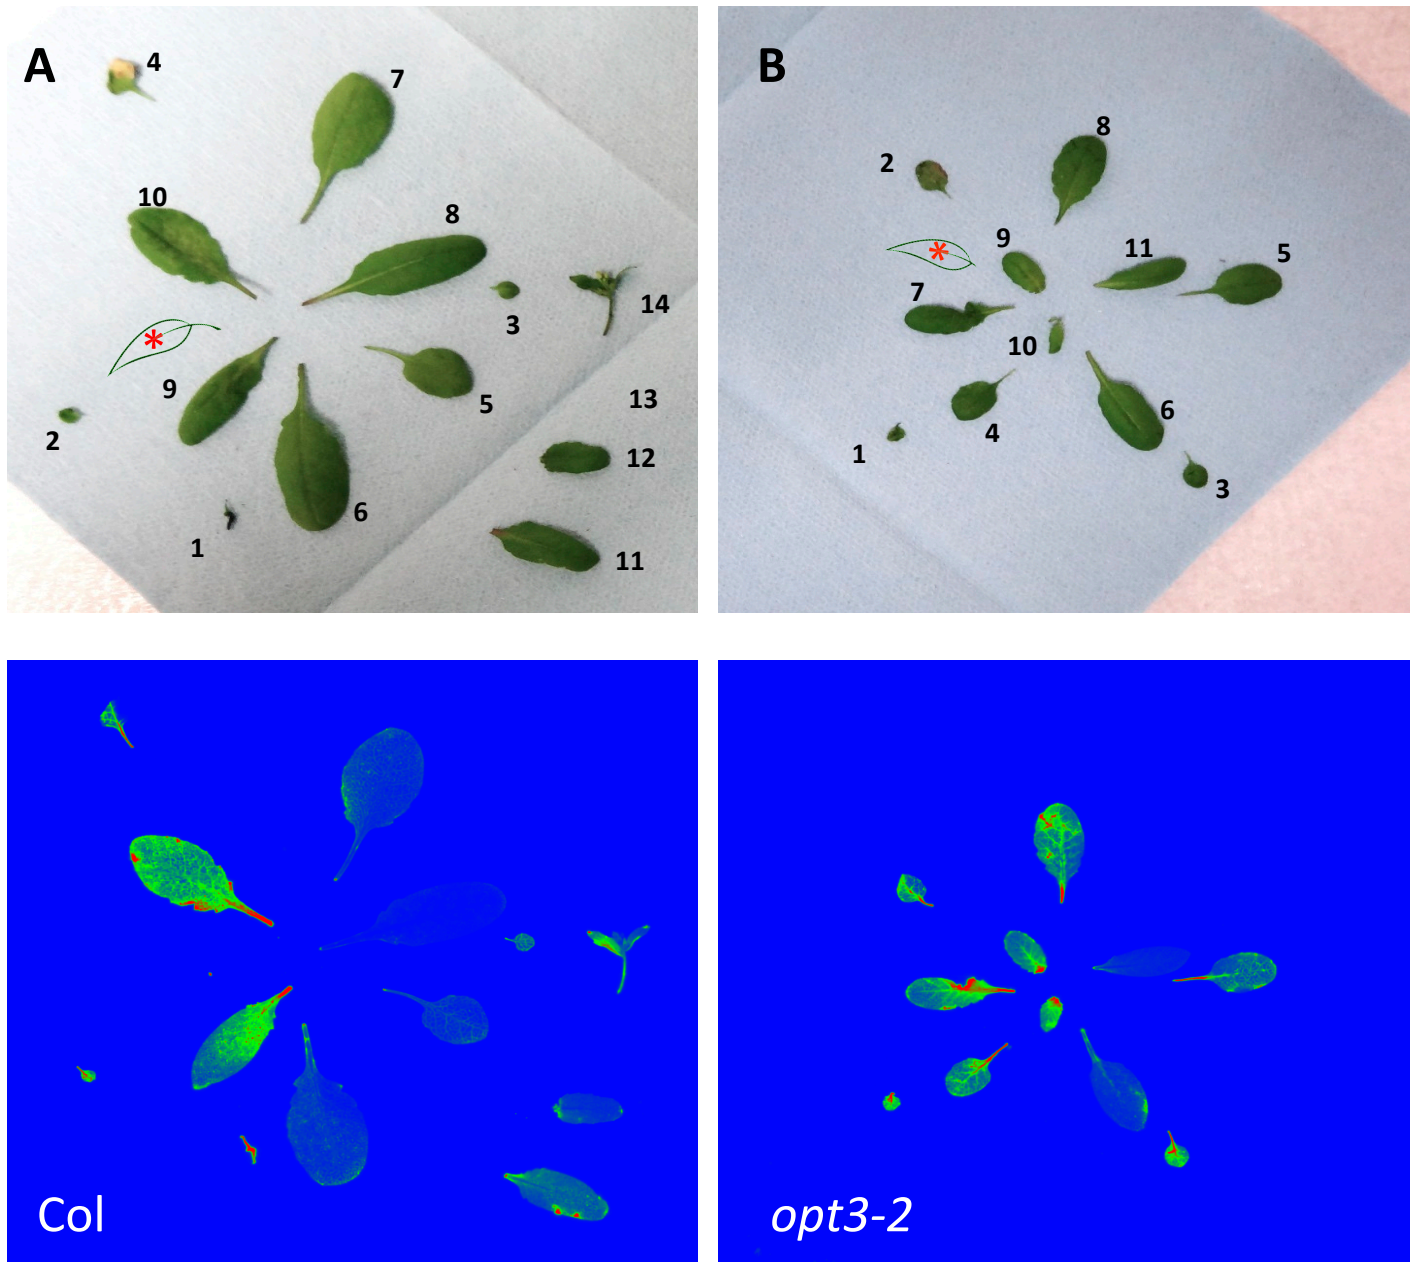

**Supplemental Figure 4:** Mobilization of <sup>35</sup>S-GSH between leaves is not impaired in *opt3-2*. <sup>35</sup>S-GSH was applied to a mature (A) wild-type or (B) *opt3-2* leaf and the distribution of <sup>35</sup>S-GSH was monitored after a 12 hr incubation period. The signal coming from <sup>35</sup>S-GSH detected with a PhosphorImager system shows that wild-type and *opt3-2* plants are able to mobilize <sup>35</sup>S-GSH to adjacent leaves (A and B, bottom panel).

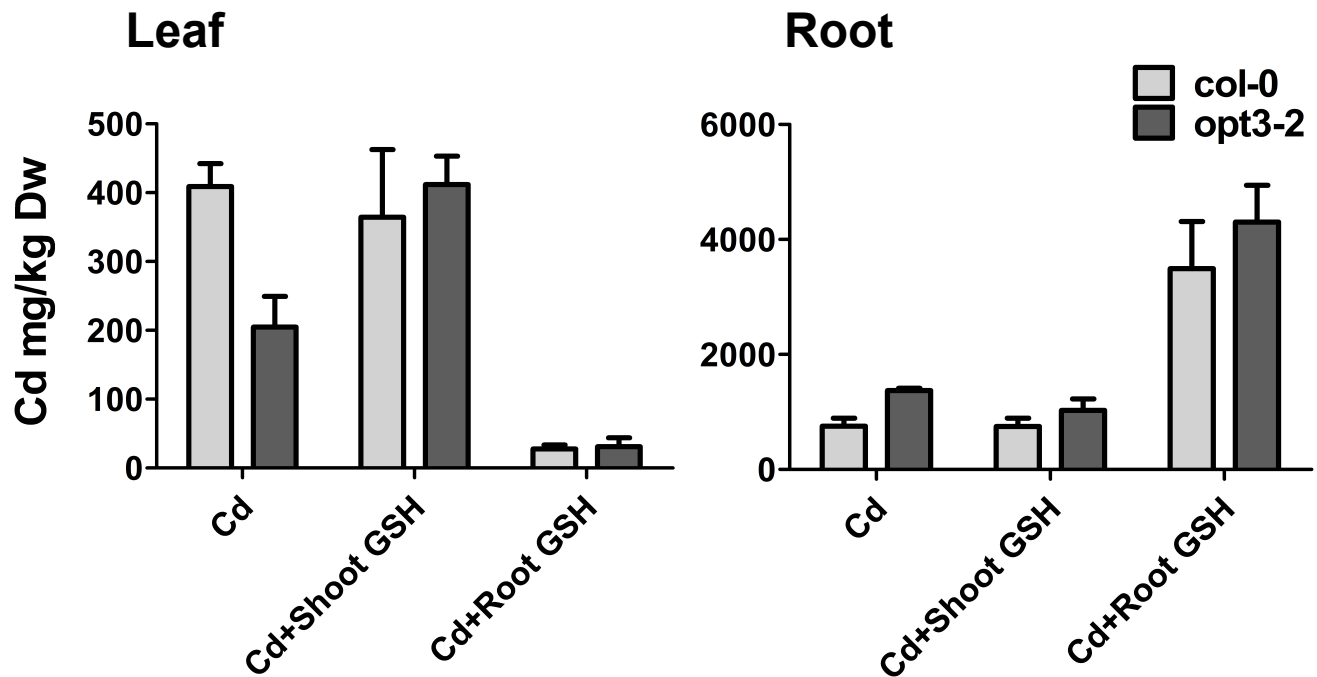

**Supplemental Figure 5:** Foliar (shoot) application of GSH to *opt3-2* restores Cd accumulation in leaves of *opt3-2* to wild-type levels. Cadmium content in leaves and roots was determined by ICP-OES. (A) In leaves, the Cd content in *opt3-2* was restored to wild type levels when applying foliar GSH (n=5). (B) In roots, Cd accumulation in *opt3-2* was not greatly affected by foliar (shoot) or root GSH application (n=4) compared to wild type in the presence and absence of GSH. Furthermore, exposure of roots to GSH (A, B) caused trapping of Cd in roots. Data represent mean  $\pm$  SE.

(A)

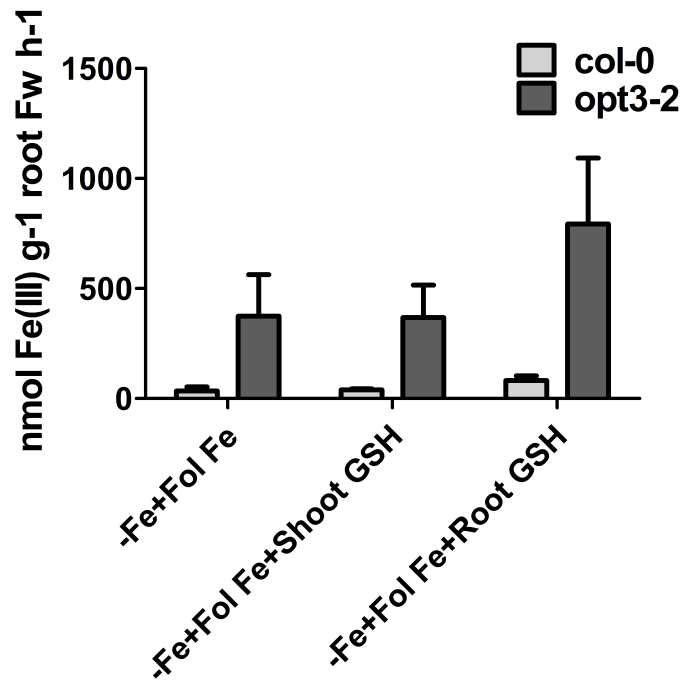

(B)

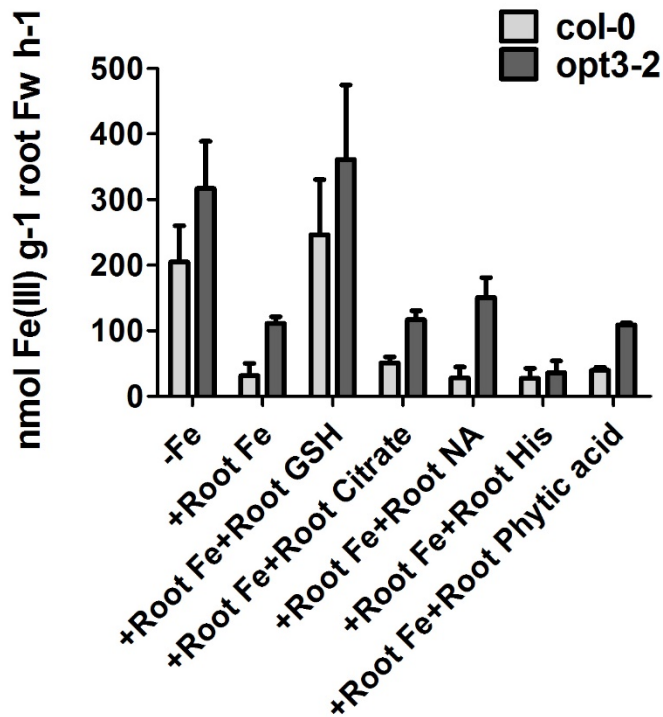

**Supplemental Figure 6:** (A) Foliar application of GSH did not suppress the constitutive Fe-deficiency response in *opt3-2*. Root iron reductase activity of *opt3-2* remained much higher than wild type plants after foliar application of Fe. Applying GSH to the shoot did not suppress the high root reductase activity of *opt3-2*. GSH application to the root also did not inhibit root iron reductase activity. (B) Application of iron, alone or in combination with citrate or nicotianamine, to roots does not restore the activity of the Fe chelate reductase to wild type levels. Data represent mean  $\pm$  SE (n=4-6).
